# Supplementary material for: Chronic Kidney Disease: Combined Effects of Gene Polymorphisms of Tissue Inhibitors of Metalloproteinase 3, Total Urinary Arsenic, and Blood Lead Concentration
Source: MDPI journal article supplement (doi:10.3390/ijerph20031886), 2023-01-19
Supplement: s1 [file s1]

## Supplementary Table

**Supplementary Table S1.** The validity and reliability of urinary arsenic species, plasma selenium, and red blood cell lead and cadmium.

| Metals or metalloids                               | Method                                                                                  | Detection limit ( $\mu\text{g/L}$ ) | Recovery rate | SRM                                                                                                                                                                                                          | CV%  |
|----------------------------------------------------|-----------------------------------------------------------------------------------------|-------------------------------------|---------------|--------------------------------------------------------------------------------------------------------------------------------------------------------------------------------------------------------------|------|
| Plasma selenium                                    | Inductively coupled plasma mass spectrometry                                            | 0.193                               |               | SRMs (Seronorm Trace Elements Whole Blood Label II (SERO AS, Norway) contained $112 \pm 46$ mg/L of selenium, in our system $118.7 \pm 11.1$ mg/L ( $n = 7$ ))                                               | 9.8% |
| Red blood cell lead                                | Inductively coupled plasma mass spectrometry                                            | 0.32                                |               | SRMs (Seronorm Trace Elements Whole Blood L-2 (Lot 1103129)) certificate value $310.0$ $\mu\text{g/L}$ (range $186.0$ – $434.0$ $\mu\text{g/L}$ ), in our system $329.0 \pm 17.0$ $\mu\text{g/L}$            | <10% |
| Red blood cell cadmium                             | Inductively coupled plasma mass spectrometry                                            | 0.07                                |               | SRMs (Seronorm Trace Elements Whole Blood L-2 (Lot 1103129) certificate value $5.8$ $\mu\text{g/L}$ (range: $5.4$ – $6.2$ $\mu\text{g/L}$ ), in our system $6.1 \pm 0.5$ $\mu\text{g/L}$                     | <10% |
| Arsenite ( $\text{As}^{\text{III}}$ )              | High-performance liquid chromatography-hydride generator-atomic absorption spectrometry | 0.02                                | 93.8–102.2%   | SRM (National Institute of Standards and Technology (NIST, Gaithersburg, MD) 2670 certificate value $480 \pm 100$ $\mu\text{g/L}$ inorganic arsenic, in our system $507 \pm 17$ $\mu\text{g/L}$ ( $n = 4$ )) | <10% |
| Arsenate ( $\text{As}^{\text{V}}$ )                |                                                                                         | 0.10                                |               |                                                                                                                                                                                                              |      |
| Monomethylarsonic acid ( $\text{MMA}^{\text{V}}$ ) |                                                                                         | 0.07                                |               |                                                                                                                                                                                                              |      |
| Dimethylarsinic acid ( $\text{DMA}^{\text{V}}$ )   |                                                                                         | 0.06                                |               |                                                                                                                                                                                                              |      |
